# Supplementary material
Source: publisher figshare collection journal article supplement (https://tandf.figshare.com/articles/dataset/_/13109835)

### A. Model 1

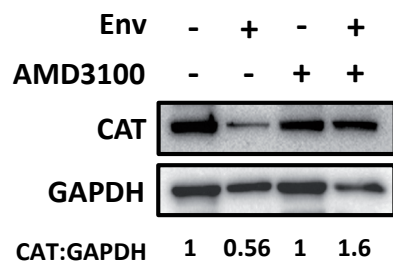

### B. Model 1

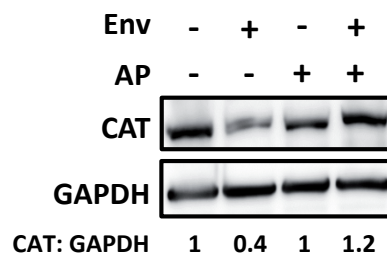

### C. Model 1

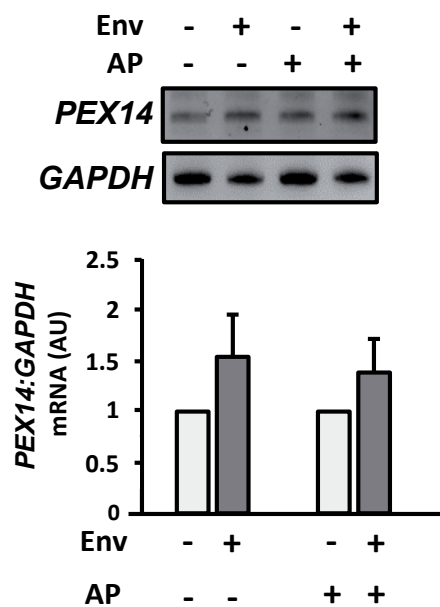

### D. Model 2

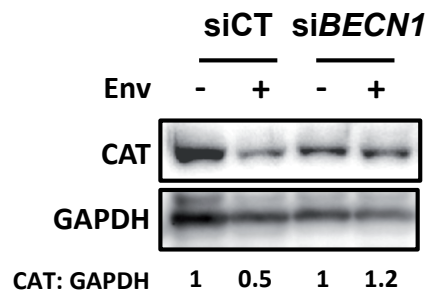

Supplement: Supplementary file 1 [file 3]

**A. Model 1**

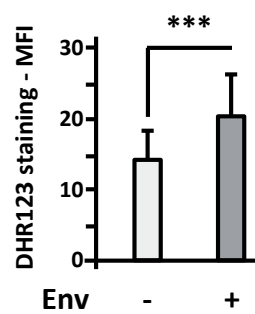

**B. Model 1**

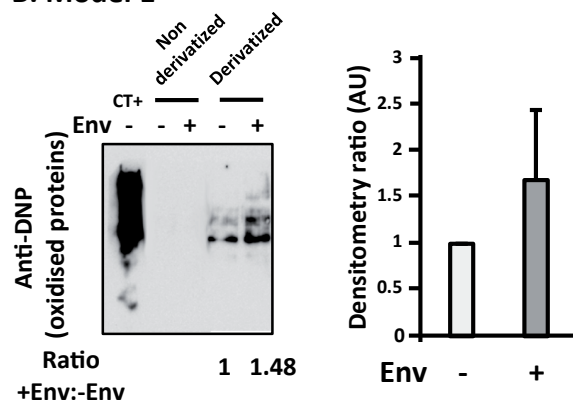

**C. Model 1**

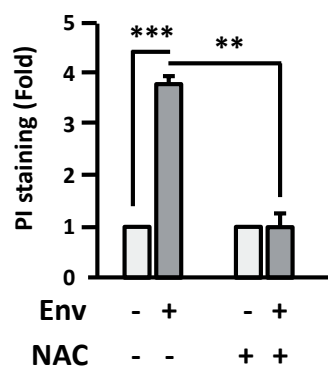

Supplement: Supplementary file 2 [file 3]
